# Supplementary material for: The near-infrared luminescence and magnetism of dinuclear complexes with different local symmetries constructed from a β-diketonate co-ligand and bis-Schiff base ligand
Source: Royal Society of Chemistry journal article supplement (doi:10.1039/c9nj05571a), 2020-01-01
Supplement: c9nj05571a1.pdf [file c9nj05571a1.pdf]

*Electronic supplementary information*

**Near-infrared luminescence and magnetism of dinuclear complexes with different local symmetries constructed by  $\beta$ -diketonate coligand and bis-Schiff base ligand**

Huan-Huan Chen,<sup>a</sup> Dong-Fang Wu,<sup>a</sup> Yao-Yao Duan,<sup>a</sup> Ling Li,<sup>a</sup> Yun-Juan Wang,<sup>a</sup> Xue-Mei Zhang,<sup>a</sup> Jian-Zhong Cui<sup>\*a,b</sup> and Hong-Ling Gao<sup>\*a,b</sup>

**List of Contents**

**Supplementary Experimental section**

**Fig. S1** <sup>1</sup>H NMR spectrum (400 MHz, *d*<sub>6</sub>-DMSO) of H<sub>2</sub>L.

**Fig. S2** IR spectra of a crystalline sample of H<sub>2</sub>L.

**Table S1** The important bond lengths (Å) and angles (°) of complexes **1-5**.

**Fig. S3** PXRD patterns for complexes **1-5**.

**Fig. S4** PXRD patterns for complexes **1-5** exposed different times in the air.

**Fig. S5** PXRD patterns for complexes **1-5** in different solvents.

**Fig. S6** TGA curves of complexes **1-5** on crystalline sample under the air atmosphere in the temperature range of 30-800 °C.

**Fig. S7** UV-Vis absorption spectra of complexes **1-5** in dichloromethane solution at room temperature.

**Fig. S8** The luminescence spectra of complexes **1-2** and ligands (H<sub>2</sub>L, dbm<sup>-</sup>) in dichloromethane solution at room temperature.

**Fig. S9** Temperature dependence of  $\chi'$  (a) and  $\chi''$  (b) signals of the *ac* susceptibilities under different frequency (Hz) for **2** ( $H_{ac} = 3$  Oe,  $H_{dc} = 0$  Oe).

---

<sup>a</sup>Department of Chemistry, Tianjin University, Tianjin, 300354, China.

\* Corresponding authors, E-mail: cuijianzhong@tju.edu.cn, ghl@tju.edu.cn.

<sup>b</sup>Key Laboratory of Advanced Energy Materials Chemistry (Ministry of Education), Nankai University, Tianjin, 300071, China.

## 1. The instruments and test conditions

The elemental composition of the samples including C, H and N were analysed by a Perkin Elmer 240 CHN elemental analyzer. IR spectra were obtained on a Bruker TENSOR 27 spectrometer in 4000-400  $\text{cm}^{-1}$  adopting the KBr pellet. Powder X-ray diffraction (PXRD) patterns were gained utilizing Cu/ $K\alpha$  radiation on a Rigaku D/Max 2500v/pc X-diffractometer in the region of  $2\theta = 5\text{-}50^\circ$ . TGA were measured by a NETSCH 409 PC instrument during 30-800  $^\circ\text{C}$  in air. UV-Vis spectra were obtained by a TU-1901. Luminescence properties were recorded on an F-4500 FL spectrophotometer with a xenon arc lamp as the light source at room temperature. NIR spectra were acquired on a Nanolog FL3-2iHR infrared fluorescence spectrophotometer. Magnetic tests were completed utilizing the PPMS-9 ACMS magnetometer.

Single-crystal data of **1-5** were collected by the  $\omega$ - $\phi$  scanning technique and the wavelength  $\lambda = 0.71073 \text{ \AA}$  on a computer-controlled Rigaku Saturn 724 CCD area detector diffractometer with confocal monochromated Mo- $K\alpha$  at in the range of temperature 113-133 K. The crystal structures were solved using direct means with the SHELXL-2018 program. In view of  $F^2$  with SHELX-2018 program, the crystal structures were refined via full matrix least-squares methods. Anisotropic thermal parameters were allotted to all non-hydrogen atoms.

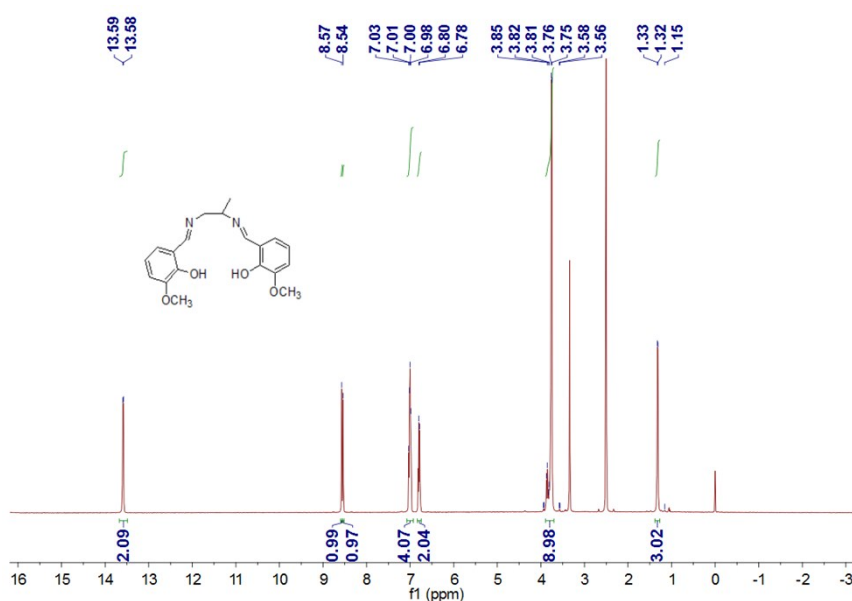

**Fig. S1**  $^1\text{H}$  NMR spectrum (400 MHz,  $d_6$ -DMSO) of  $\text{H}_2\text{L}$ .

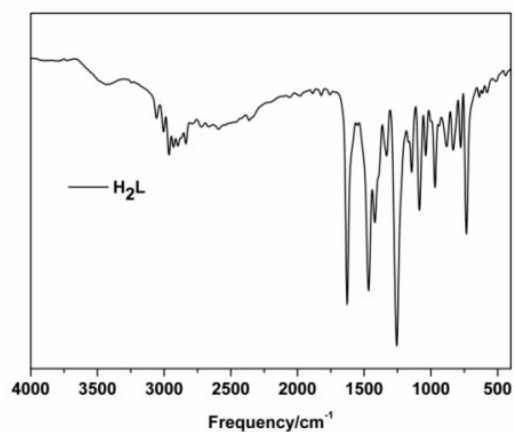

**Fig. S2** IR spectra of a crystalline sample of H<sub>2</sub>L.

**Table S1** The important bond lengths (Å) and angles (°) of complexes **1-5**.

| Complex  | The range of Ln-O bond lengths / Å | The range of Ln-N bond lengths / Å | The range of Ln-O-Ln bond angles / ° |
|----------|------------------------------------|------------------------------------|--------------------------------------|
| <b>1</b> | 2.277(3) - 2.685(3)                | 2.481(4) - 2.489(3)                | 110.52(11) - 113.31(11)              |
| <b>2</b> | 2.294(2) - 2.690(3)                | 2.487(3) - 2.494(3)                | 110.73(10) - 113.30(10)              |
| <b>3</b> | 2.277(4) - 2.675(4)                | 2.478(4) - 2.480(5)                | 110.83(14) - 113.53(14)              |
| <b>4</b> | 2.269(4) - 2.684(4)                | 2.470(5) - 2.477(5)                | 110.64(16) - 113.70(16)              |
| <b>5</b> | 2.238(4) - 2.678(5)                | 2.456(6) - 2.468(5)                | 110.24(17) - 113.67(19)              |

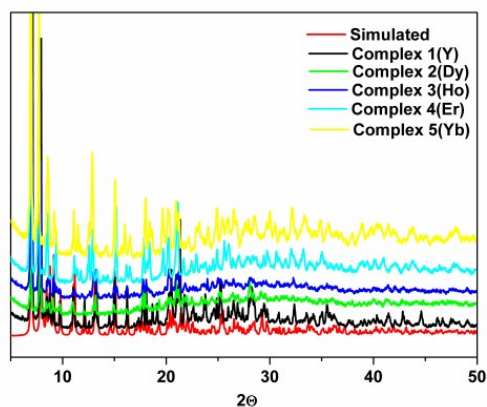

**Fig. S3** PXRD patterns for complexes1-5.

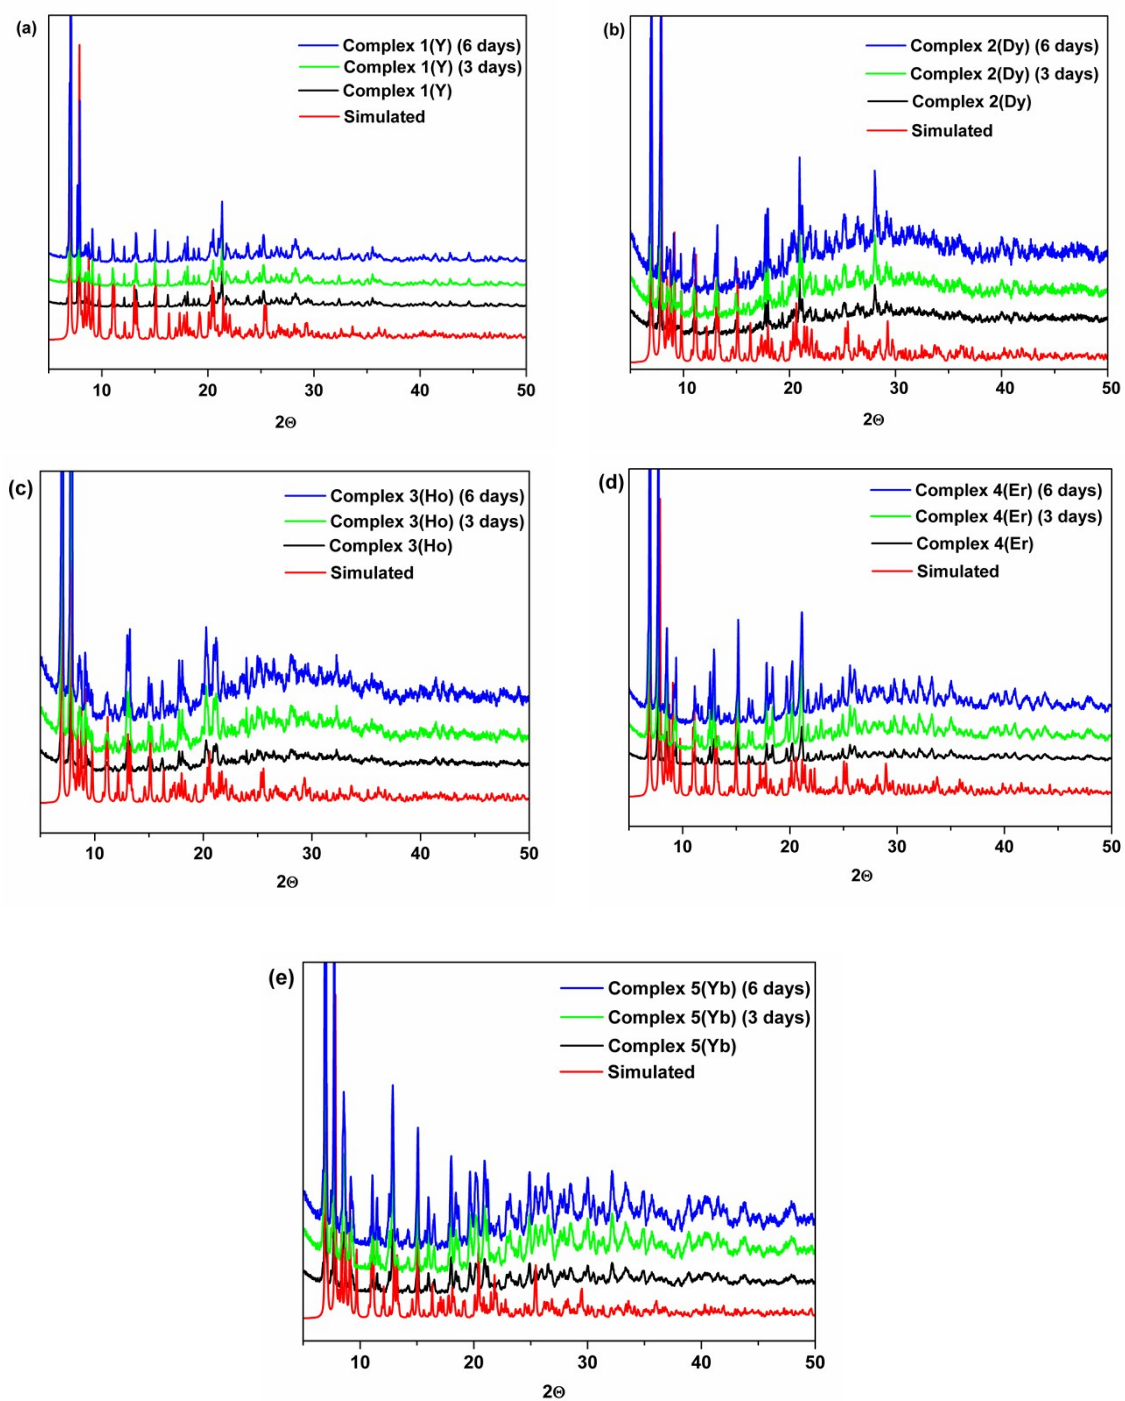

**Fig. S4** PXRD patterns for complexes **1-5** exposed different times in the air.

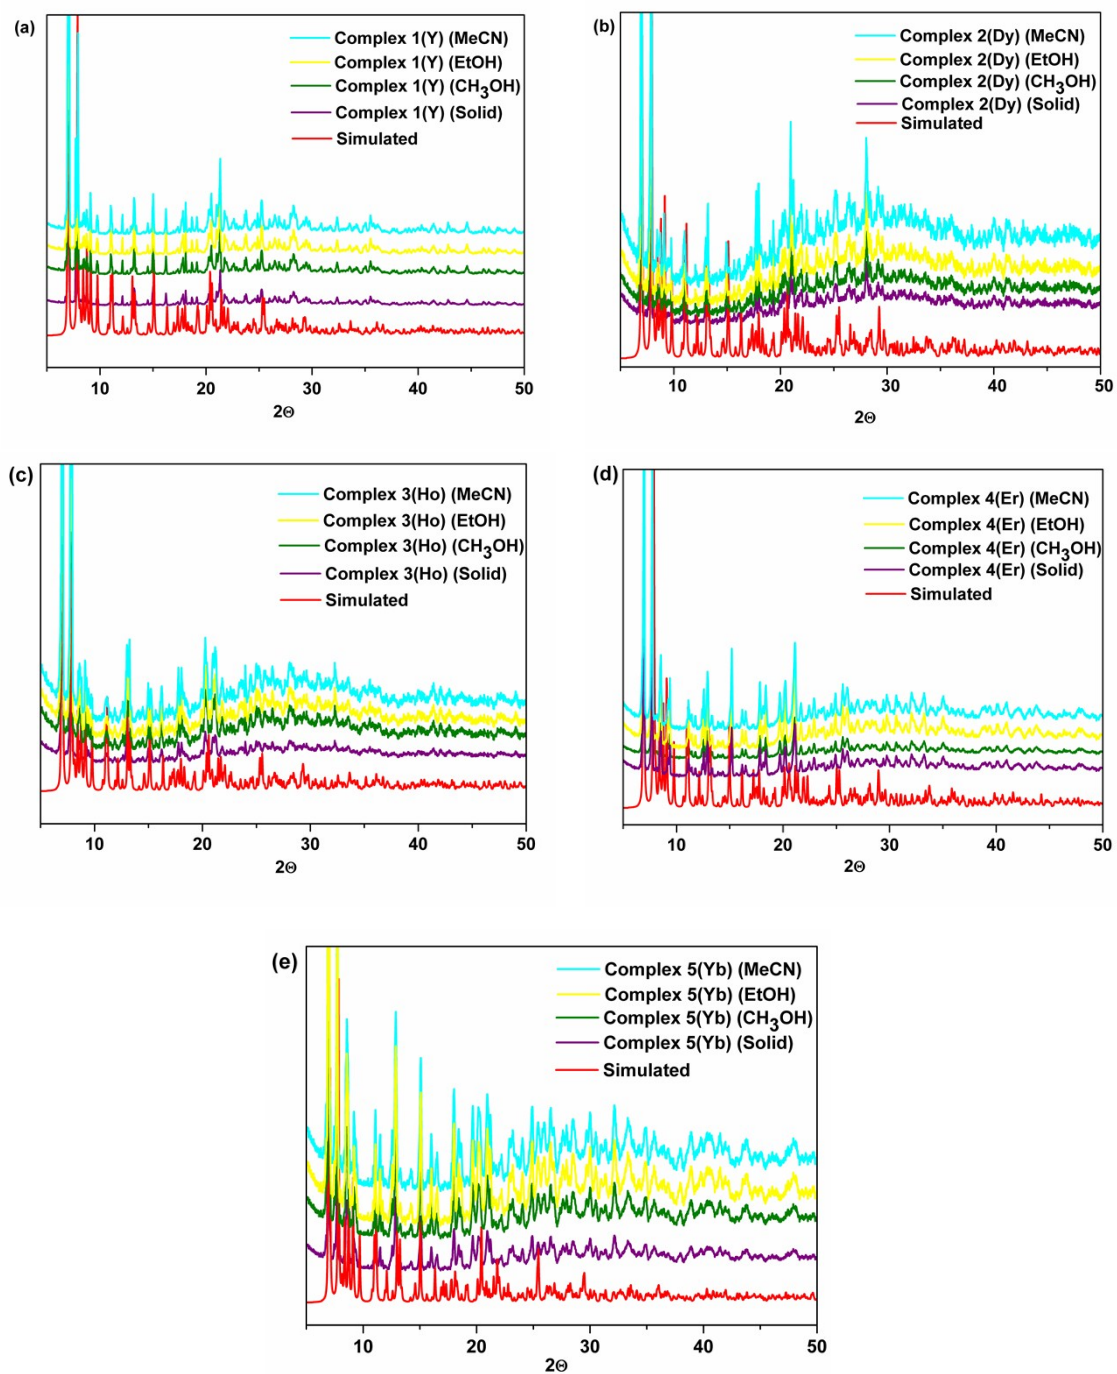

**Fig. S5** PXRD patterns for complexes **1-5** in different solvents.

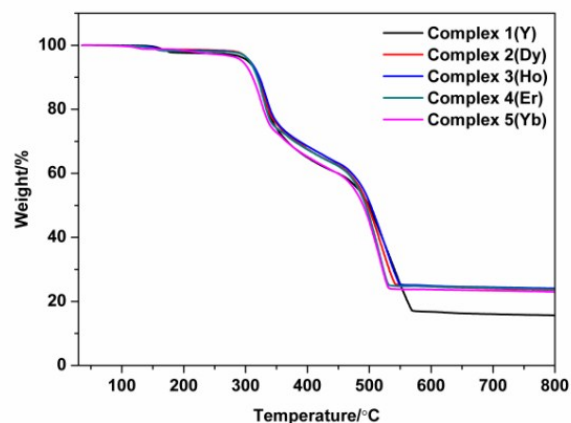

**Fig. S6** TGA curves of complexes 1-5 on crystalline sample under the air atmosphere in the temperature range of 30-800 °C.

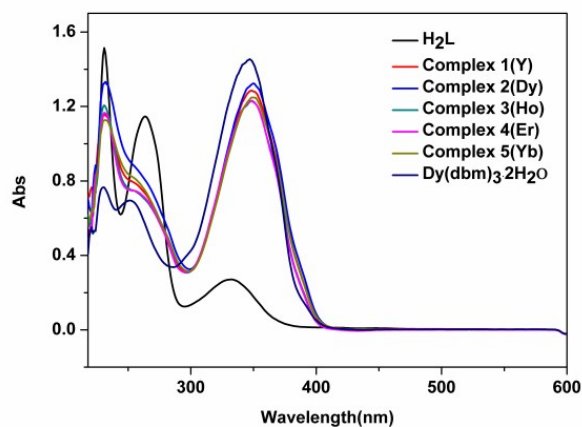

**Fig. S7** UV-Vis absorption spectra of complexes 1-5 in dichloromethane solution at room temperature.

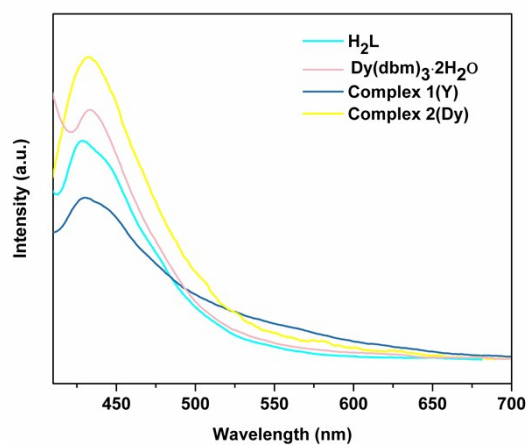

**Fig. S8** The luminescence spectra of complexes 1-2 and ligands (H<sub>2</sub>L, dbm<sup>-</sup>) in dichloromethane solution at room temperature.

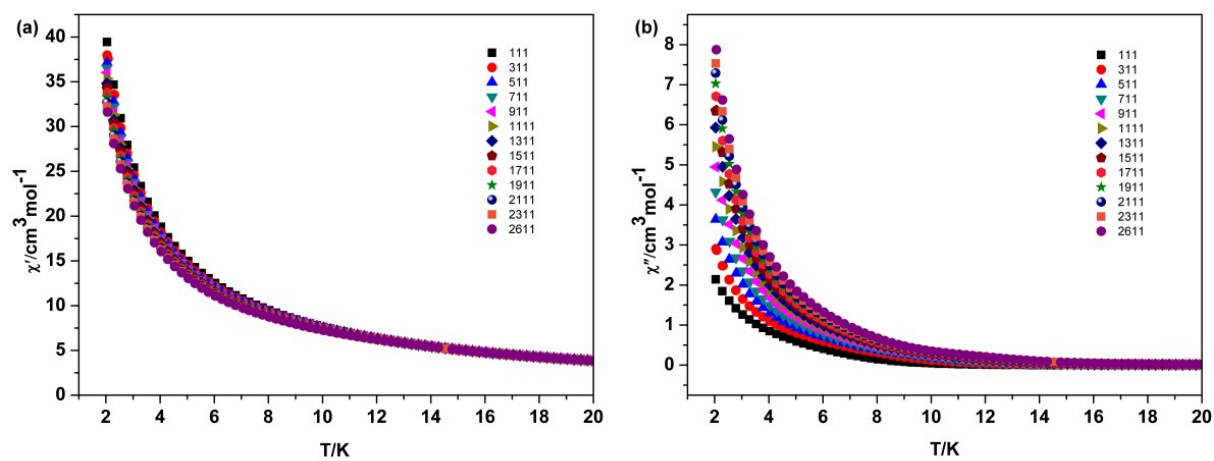

**Fig. S9** Temperature dependence of  $\chi'$  (a) and  $\chi''$  (b) signals of the *ac* susceptibilities under different frequency (Hz) for **2** ( $H_{ac} = 3$  Oe,  $H_{dc} = 0$  Oe).
